# Supplementary material for: Layered double hydroxides supported on multi-walled carbon nanotubes: preparation and CO2 adsorption characteristics
Source: Royal Society of Chemistry journal article supplement (doi:10.1039/c2jm00059h), 2012-01-01
Supplement: c2jm00059h.pdf [file c2jm00059h.pdf]

**Supporting Information:** Ainara Garcia-Gallastegui, Diana Iruretagoyena, Mohamed Mokhtar, Abdullah M. Asiri, Sulaiman N. Basahel, Shaeel A. Al-Thabaiti, Abdulrahman O. Alyoubi, David Chadwick, Milo S. P. Shaffer, *J. Mater. Chem.* Manuscript.

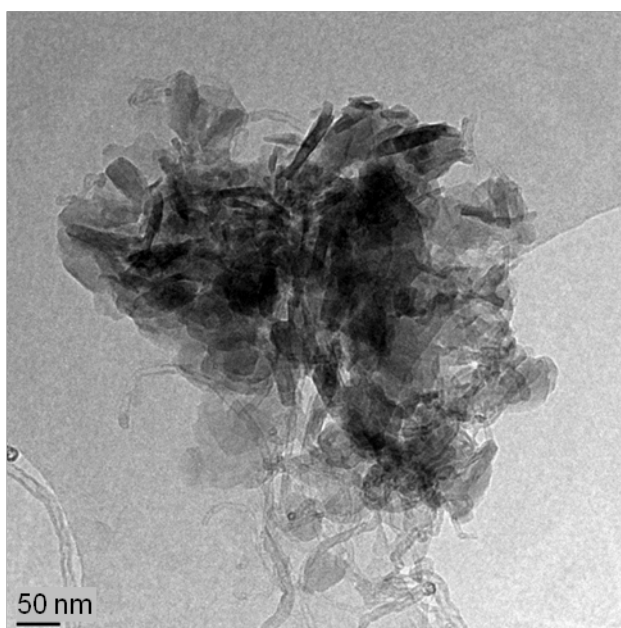

**Fig SI 1** Representative TEM image corresponding to the LDH/MWNT sample containing 62wt% LDH.

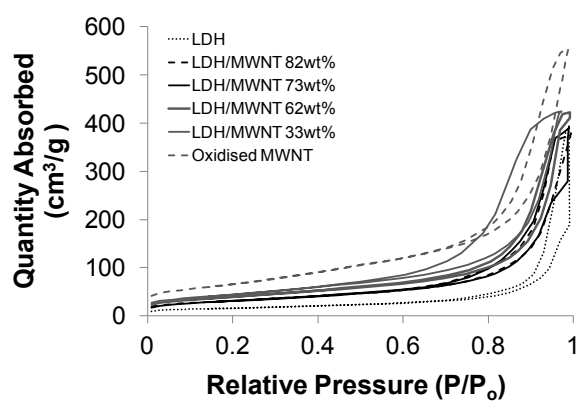

**Fig SI 2** Adsorption-desorption nitrogen isotherms of LDH, oxidised MWNT and LDH/MWNT samples showing type IV isotherms according to the IUPAC classification.
